# Supplementary material for: Regulating oxygen vacancies in ultrathin δ-MnO2 nanosheets with superior activity for gaseous ozone decomposition
Source: Royal Society of Chemistry journal article supplement (doi:10.1039/d1en00149c), 2021-01-01
Supplement: d1en00149c1.pdf [file d1en00149c1.pdf]

## Supplementary Information

### **Regulating oxygen vacancy in ultrathin $\delta$ -MnO<sub>2</sub> nanosheets with superior activity for gaseous ozone decomposition**

Ranran Cao <sup>a</sup>, Lianxin Li <sup>a</sup>, Pengyi Zhang <sup>a,b,\*</sup>, Lele Gao <sup>a</sup> and Shaopeng Rong <sup>c</sup>

*a. State Key Joint Laboratory of Environment Simulation and Pollution Control, School of Environment, Tsinghua University, Beijing 100084, China.*

*b. Beijing Key Laboratory for Indoor Air Quality Evaluation and Control, Beijing 100084, China.*

*c. Jiangsu Key Laboratory of Chemical Pollution Control and Resources Reuse, School of Environmental and Biological Engineering, Nanjing University of Science and Technology, Nanjing 210094, China.*

-----

\* Corresponding author

E-mail address: [zpy@tsinghua.edu.cn](mailto:zpy@tsinghua.edu.cn)

Tel: +86-010-62796840

### **Details for some characterizations**

The N<sub>2</sub> adsorption-desorption isotherms at 77 K were obtained with a Quantachrome physical adsorption apparatus (Autosorb-iQ3, USA). The specific surface area ( $S_{\text{BET}}$ ) was calculated by the BET method and the pore volume ( $V_{\text{pore}}$ ) was determined by the BJH method using the adsorption branch of the isotherm. The samples were degassed in vacuum at 200 °C for 4 h before measurements.

H<sub>2</sub>-TPR and O<sub>2</sub>-TPD were performed on a Micromeritics chemical adsorption instrument (AutoChem II 2920, USA). For H<sub>2</sub>-TPR, 50 mg catalyst was pretreated at 105 °C in the atmosphere of He for 30 min. After cooled down to 40 °C, it was purged by 5% H<sub>2</sub>/Ar for another 30 min to stabilize the baseline. Subsequently, it was heated up in the atmosphere of 5% H<sub>2</sub>/Ar at the rate of 10 °C/min from 40 °C to 700 °C. For O<sub>2</sub>-TPD, after the same pretreatment and cooled down to 40 °C, 50 mg catalyst was purged by 5% O<sub>2</sub>/He for 30 min. Subsequently, when the baseline became stable under the helium flow, it was heated up from 40 °C to 900 °C at the rate of 10 °C/min and the gas products were monitored by the online mass spectrometer (Hiden Analytical HPR-20 R&D, Britain). For H<sub>2</sub>-TPR and O<sub>2</sub>-TPD experiments, an isopropyl alcohol / liquid nitrogen slurry was served as the cold trap to condense the possible water vapor before the emitted gases flowed into the thermal conductivity detector (TCD).

### **Theoretical calculations**

Density functional theory (DFT) calculations were performed using the Vienna Ab-initio Simulation Package (VASP) code.<sup>1-4</sup> The generalized gradient approximation (GGA) with the Perdew–Burke–Ernzerhof (PBE) functional was adopted as the

exchange-correlation functional.<sup>5,6</sup> Ion–electron interactions were represented by ultrasoft pseudopotentials within the framework of the projector-augmented wave (PAW) method.<sup>5</sup> For the total energy calculations, the plane wave cutoff energy was 400 eV. The Brillouin zone integration was approximated by a sum over special selected k-points using the 3×3×1 MonkhorstPack method.<sup>7</sup> We optimized a monoclinic structure of MnO<sub>2</sub> (C2/m) with lattice constants of a = 5.149 Å, b = 2.843 Å, and c = 7.176 Å.<sup>8</sup> Due to the inaccuracy of standard DFT in describing the partially filled d-states in Mn<sup>3+</sup> ions, the GGA+U formalism was used to correct the on-site Coulomb and exchange interactions for localized d orbitals and the values of U-J = 5.10 eV and J = 1.00 eV were adopted.<sup>9</sup> Because ultrathin δ-MnO<sub>2</sub> sub-microsheets mainly exposed (001) planes in the present work, the (001) surface slab was considered in this study. During the calculations, the bottom layer was fixed, and the other layers and the adsorbed species were relaxed. Moreover, in order to eliminate the interactions between slabs, the vacuum region was set to 15 Å in the z direction to separate the slabs. The geometries were optimized until the energy was converged to 1×10<sup>-5</sup> eV/atom and the forces to 0.02 eV/Å.

The surface energy of pristine [MnO<sub>6</sub>] sheet ( $\gamma_1$ ) was obtained through the following equation:

$$\gamma_1 = \frac{E_{Slab}^N - N \cdot E_b}{2 \cdot A}$$

The surface energy of NH<sub>4</sub><sup>+</sup>-adsorbed [MnO<sub>6</sub>] sheet ( $\gamma_2$ ) was calculated from the relation:<sup>10</sup>

$$\gamma_2 = \frac{E_{Slab}^{N+NH_4^+} - N \cdot E_b - E_{NH_4^+}^{Form}}{A} - \gamma_1$$

where  $E_{Slab}^N$  and  $E_{Slab}^{N+NH_4^+}$  were the total energy of the clean slab and the  $NH_4^+$ -adsorbed slab with N formula units, respectively.  $E_b$  was the total energy of per formula unit of the bulk. A was the area of one slab surface.  $E_{NH_4^+}^{Form}$  was the energy of the  $NH_4^+$ . The adsorption energy ( $E_{ads}$ ) of the adsorbate, i.e.  $O_3$  or  $H_2O$  was obtained through

the following equation:

$$E_{ads} = E_{total} - E_{basic} - E_{adsorbate},$$

where  $E_{total}$ ,  $E_{basic}$  and  $E_{adsorbate}$  were the total energy of the adsorption model, the energy of the clean slab and the energy of an isolated molecule of  $O_3$  or  $H_2O$ , respectively.

The relative energy of each elementary step in ozone decomposition reaction was calculated according to equations (1)-(5).

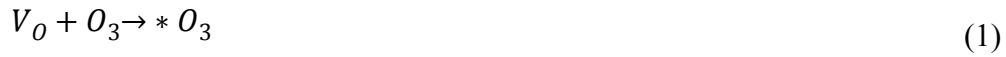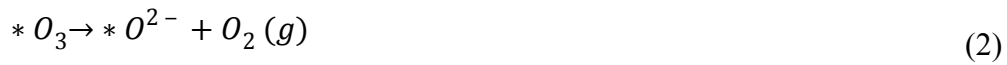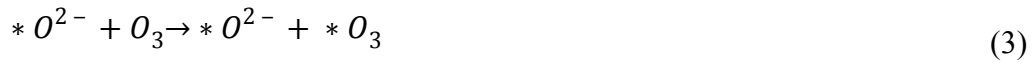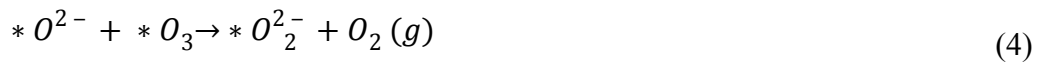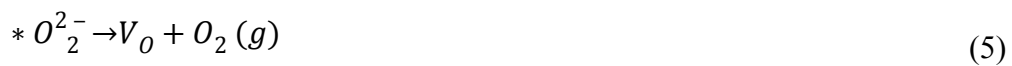

**Table S1.** Catalytic activity of MnO<sub>x</sub> catalysts for ozone decomposition

| Catalyst                             | O <sub>3</sub> conc<br>(ppm) | T<br>(°C) | RH<br>(%) | WHSV<br>(L · g <sub>cat</sub> <sup>-1</sup> · h <sup>-1</sup> ) | Time<br>(h) | O <sub>3</sub> conv<br>(%) | Reaction rate<br>(μg · g <sub>cat</sub> <sup>-1</sup> · min <sup>-1</sup> ) | Ref.             |
|--------------------------------------|------------------------------|-----------|-----------|-----------------------------------------------------------------|-------------|----------------------------|-----------------------------------------------------------------------------|------------------|
| 1M KOH-4h (α-MnO <sub>2</sub> )      | 50                           | 25        | 22        | 540                                                             | 15          | 99                         | 874.56                                                                      | 7                |
| NaMn3 (α-MnO <sub>2</sub> )          | 45                           | 25        | 30        | 660                                                             | 6           | 92.5                       | 898.85                                                                      | 8                |
| vac-200-4h (α-MnO <sub>2</sub> )     | 20                           | 25        | 30        | 540                                                             | 12          | 48                         | 169.61                                                                      | 9                |
| Ce-γ-MnO <sub>2</sub>                | 40                           | 30        | 65        | 840                                                             | 6           | 96                         | 1037.94                                                                     | 10               |
| Ce-MnO <sub>x</sub> -2               | 100                          | 25        | 50        | 540                                                             | 10          | 100                        | 1766.78                                                                     | 11               |
| MnO <sub>2</sub> -H2                 | 45                           | 25        | 50        | 600                                                             | 6           | 91.3                       | 806.53                                                                      | 15               |
| H-MnO <sub>2</sub>                   | 115                          | 25        | 50        | 600                                                             | 5           | 60                         | 1354.53                                                                     | 24               |
| W-MnO <sub>2</sub>                   | 120                          | 25        | 65        | 660                                                             | 4           | 50                         | 1295.64                                                                     | 40               |
| Mn <sub>3</sub> O <sub>4</sub> /CNTs | 50                           | 25        | 50        | 1200                                                            | 12          | 70.4                       | 1382.01                                                                     | 43               |
| CeMn <sub>10</sub> O <sub>x</sub>    | 40                           | 30        | 65        | 840                                                             | 6           | 99.5                       | 1075.78                                                                     | 44               |
| 50-1-N-MnO <sub>2</sub>              | 115                          | 25        | 50        | 600                                                             | 6           | 80                         | 1806.04                                                                     | 45               |
| <b>MnO<sub>2</sub>-N</b>             | <b>100</b>                   | <b>25</b> | <b>50</b> | <b>600</b>                                                      | <b>26</b>   | <b>100</b>                 | <b>1963.09</b>                                                              | <b>This work</b> |

## Figure Captions

**Figure S1.** (a, b) AFM images of single ultrathin  $\delta$ -MnO<sub>2</sub> sub-microsheet and relevant height profiles in (c).

**Figure S2.** SEM images of U-MnO<sub>2</sub> aged in the (NH<sub>4</sub>)<sub>2</sub>SO<sub>4</sub> solution (a) and in the NaCl solution (b).

**Figure S3.** Raman spectra of U-MnO<sub>2</sub>, MnO<sub>2</sub>-N, MnO<sub>2</sub>-W and MnO<sub>2</sub>-K.

**Figure S4.** (a-f) Time-dependent SEM images of the U-MnO<sub>2</sub> precursor aged in the NH<sub>4</sub>Cl solution for 3 h, 6 h, 12 h, 24 h, 48 h and 72 h.

**Figure S5.** Schematic illustration of the formation of MnO<sub>2</sub>-N.

**Figure S6.** The surface energies and schematic diagrams of (a) clean [MnO<sub>6</sub>] sheet and (b) NH<sub>4</sub><sup>+</sup>-adsorbed [MnO<sub>6</sub>] sheet.

**Figure S7.** N<sub>2</sub> adsorption/desorption isotherms of (a) U-MnO<sub>2</sub>, (b) MnO<sub>2</sub>-N, (c) MnO<sub>2</sub>-W and (d) MnO<sub>2</sub>-K and the corresponding pore size distribution curves are shown in the insets.

**Figure S8.** FTIR patterns of U-MnO<sub>2</sub>, MnO<sub>2</sub>-N, MnO<sub>2</sub>-W and MnO<sub>2</sub>-K.

**Figure S9.** TG/DTG–MS curves of MnO<sub>2</sub>-N

**Figure S10.** Water adsorption isotherms of MnO<sub>2</sub>-N and MnO<sub>2</sub>-K.

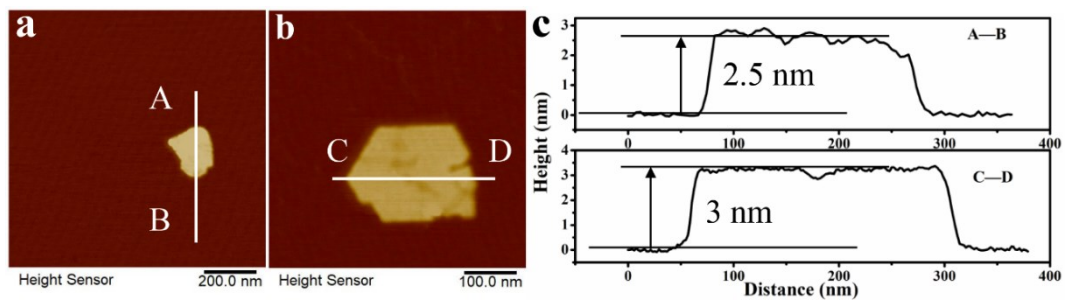

**Figure S1** (a, b) AFM images of single ultrathin  $\delta$ -MnO<sub>2</sub> sub-microsheet and relevant height profiles in (c).

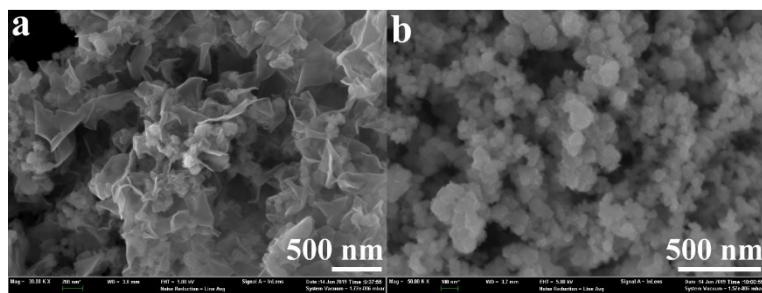

**Figure S2.** SEM images of U-MnO<sub>2</sub> aged in the (NH<sub>4</sub>)<sub>2</sub>SO<sub>4</sub> solution (a) and in the NaCl solution (b).



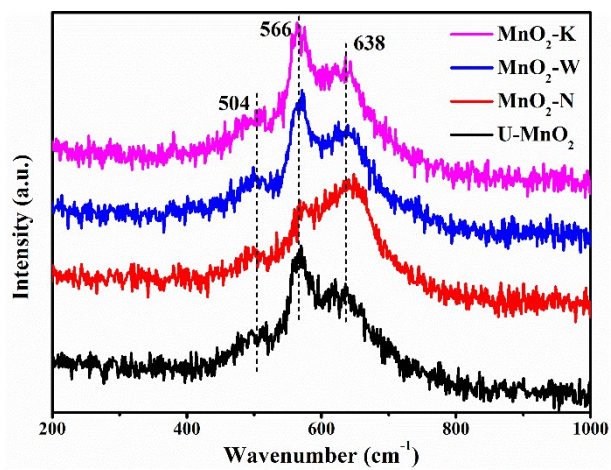

**Figure S3.** Raman spectra of U-MnO<sub>2</sub>, MnO<sub>2</sub>-N, MnO<sub>2</sub>-W and MnO<sub>2</sub>-K.

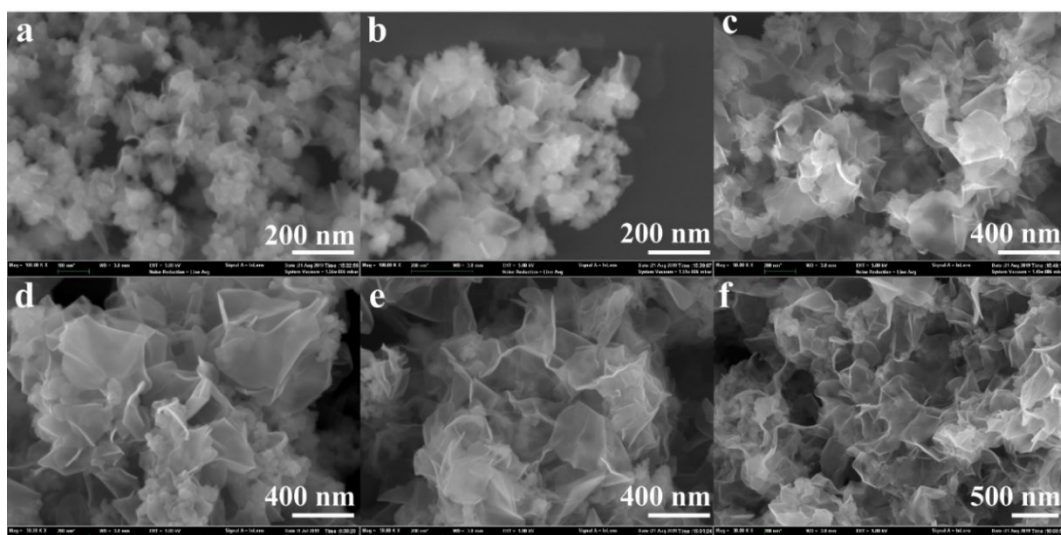

**Figure S4.** (a-f) Time-dependent SEM images of the U-MnO<sub>2</sub> precursor aged in the NH<sub>4</sub>Cl solution for 3 h, 6 h, 12 h, 24 h, 48 h and 72 h.

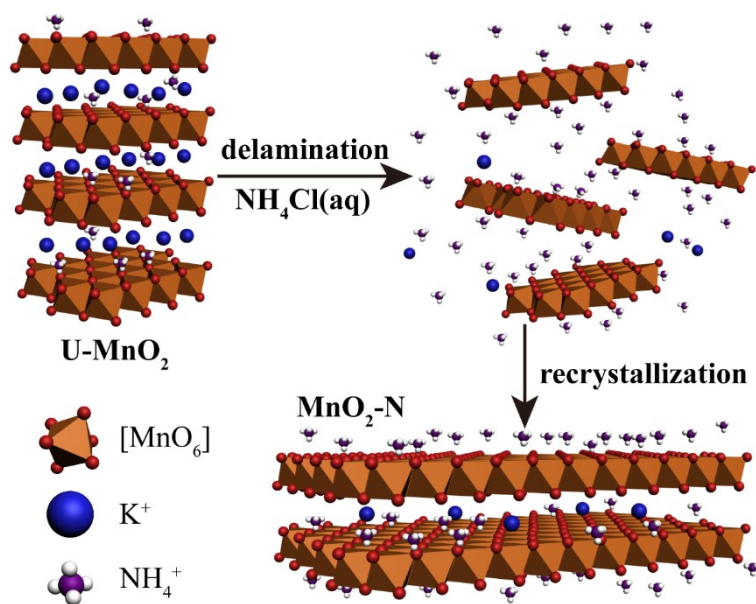

**Figure S5.** Schematic illustration of the formation of MnO<sub>2</sub>-N.

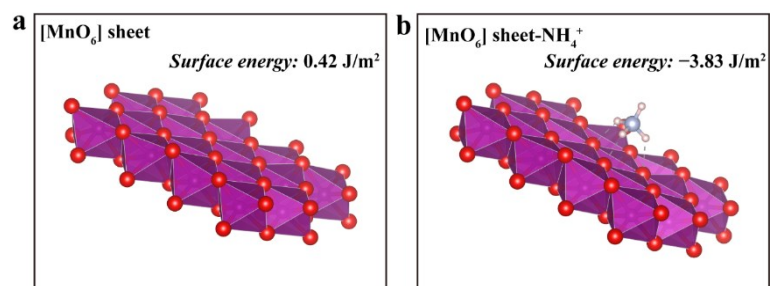

**Figure S6.** The surface energies and schematic diagrams of (a) clean  $[\text{MnO}_6]$  sheet and (b)  $\text{NH}_4^+$ -adsorbed  $[\text{MnO}_6]$  sheet.

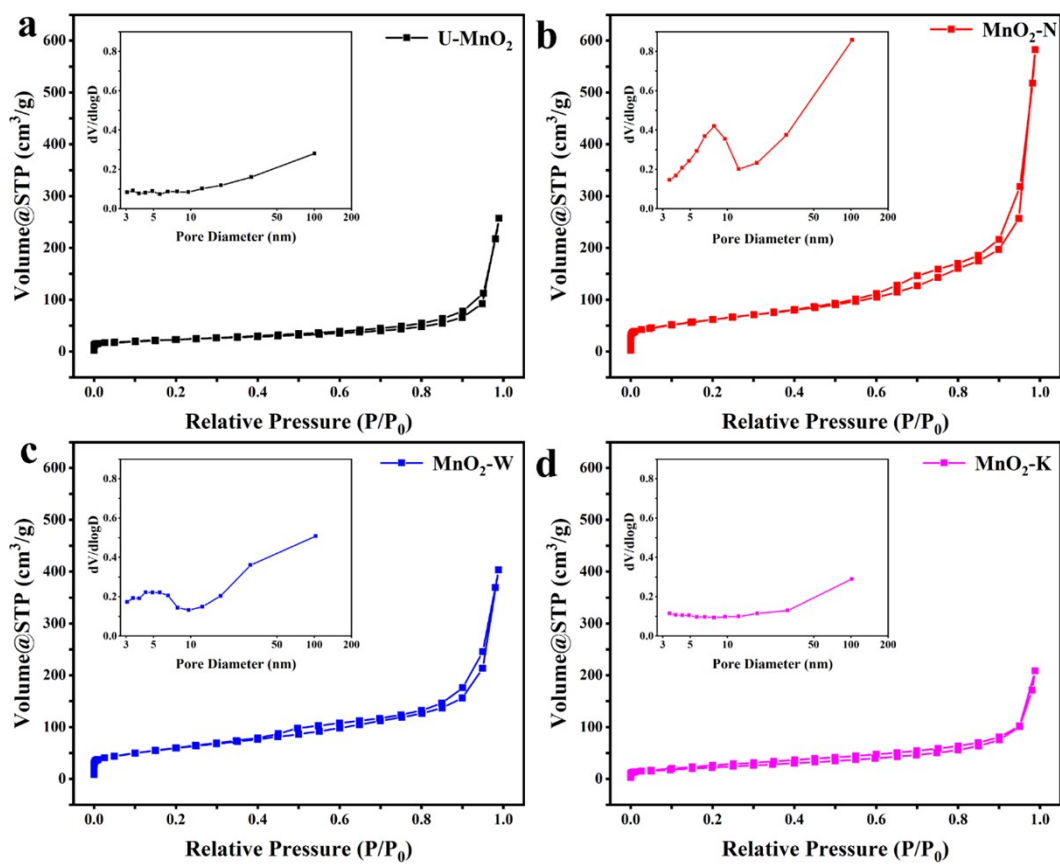

**Figure S7.**  $N_2$  adsorption/desorption isotherms of (a) U- $MnO_2$ , (b)  $MnO_2$ -N, (c)  $MnO_2$ -W and (d)  $MnO_2$ -K and the corresponding pore size distribution curves are shown in the insets.

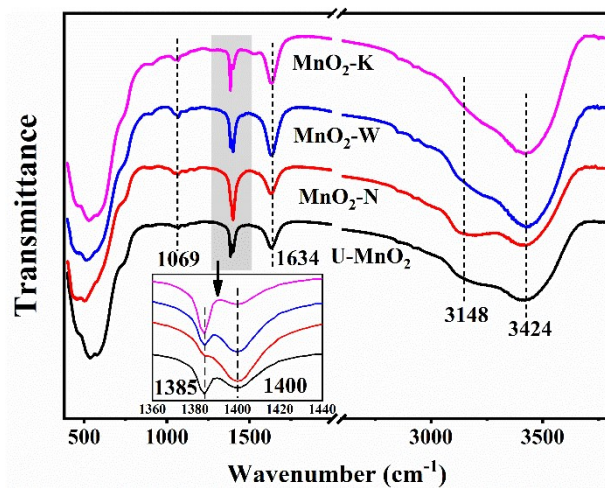

**Figure S8.** FTIR patterns of U-MnO<sub>2</sub>, MnO<sub>2</sub>-N, MnO<sub>2</sub>-W and MnO<sub>2</sub>-K.

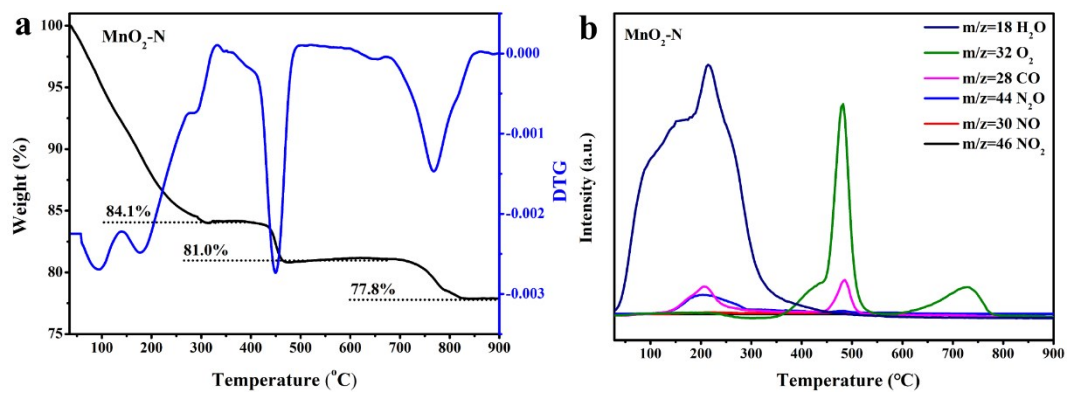

**Figure S9.** TG/DTG-MS curves of MnO<sub>2</sub>-N

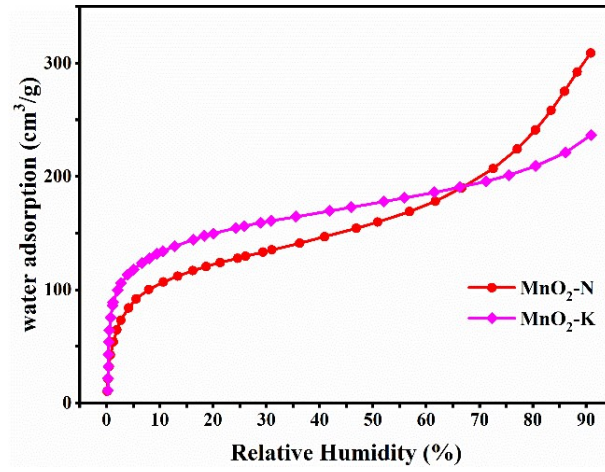

**Figure S10.** Water adsorption isotherms of MnO<sub>2</sub>-N and MnO<sub>2</sub>-K.



## References

- 1 G. Kresse and J. Furthmüller, Efficiency of ab-initio total energy calculations for metals and semiconductors using a plane-wave basis set, *Comp. Mater. Sci.*, 1996, 6, 15-50.
- 2 G. Kresse and J. Furthmüller, Efficient iterative schemes for ab-initio total energy calculations using a plane-wave basis set, *Phys. Rev. B.*, 1996, 54, 11169-11186.
- 3 P. Hohenberg, Inhomogeneous electron gas, *Phys. Rev.*, 1964, 136, B864-B871.
- 4 W. Kohn and L. J. Sham, Self-consistent equations including exchange and correlation effects, *Phys. Rev.*, 1965, 140, A1133-A1138.
- 5 P. E. Blochl, Projector augmented-wave method, *Phys. Rev. B.*, 1996, 50, 17953-17979.
- 6 J. P. Perdew, K. Burke and M. Ernzerhof, Generalized gradient approximation made simple, *Phys. Rev. Lett.*, 1996, 77, 3865-3868.
- 7 H. J. Monkhorst and J. D. Pack, Special points for brillonin-zone integrations, *Phys. Rev. B.*, 1976, 13, 5188-5192.
- 8 L. Miao, Q. Nie, J. Wang, G. Zhang and P. Zhang, Ultrathin MnO<sub>2</sub> nanosheets for optimized hydrogen evolution via formaldehyde reforming in water at room temperature, *Appl. Catal. B: Environ.*, 2019, 248, 466-476.
- 9 D. A. Tompsett, S. C. Parker and M. S. Islam, Rutile ( $\beta$ -)MnO<sub>2</sub> surfaces and vacancy formation for high electrochemical and catalytic performance, *J. Am. Chem. Soc.*, 2014, 136, 1418-1426.
- 10 R. E. Abutbul, E. Segev, U. Argaman, A. Tegze, G. Makov and Y. Golan, Stability of cubic tin sulphide nanocrystals: role of ammonium chloride surfactant headgroups, *Nanoscale*, 2019, 11, 17104-17110.
